# Supplementary material for: Thyroid cancer cells in space during the TEXUS-53 sounding rocket mission – The THYROID Project
Source: Springer Nature journal article supplement (doi:10.1038/s41598-018-28695-1), 2018-07-03

**Thyroid cancer cells in space during the TEXUS-53 sounding rocket mission – The  
THYROID Project**

Sascha Kopp<sup>a#</sup>, Marcus Krüger<sup>a#</sup>, Stefan Feldmann<sup>b</sup>, Hergen Oltmann<sup>b</sup>, Andreas Schütte<sup>b</sup>,  
Burkhard Schmitz<sup>b</sup>, Johann Bauer<sup>c</sup>, Herbert Schulz<sup>d</sup>, Kathrin Saar<sup>e</sup>, Norbert Huebner<sup>e</sup>, Markus  
Wehland<sup>a</sup>, Mohamed Zakaria Nassef<sup>a</sup>, Daniela Melnik<sup>a</sup>, Stefan Meltendorf<sup>f</sup>, Manfred Infanger<sup>a</sup>,  
Daniela Grimm<sup>a,g,h\*</sup>

<sup>a</sup> Clinic for Plastic, Aesthetic and Hand Surgery, Otto-von-Guericke-University Magdeburg,  
Leipziger Str. 44, D-39120 Magdeburg, Germany

<sup>b</sup> Airbus Defence and Space GmbH, Airbus-Allee 1, D-28199 Bremen, Germany

<sup>c</sup> Max-Planck Institute of Biochemistry, D-82152 Martinsried, Germany

<sup>d</sup> Cologne Center for Genomics, University of Cologne, D-50931 Cologne, Germany

<sup>e</sup> Max-Delbrück-Center for Molecular Medicine, D-13092 Berlin-Buch, Germany

<sup>f</sup> Experimental Pediatrics and Neonatology, University Hospital, Otto-von-Guericke University  
Magdeburg, Leipziger Str. 44, D-39120 Magdeburg, Germany

<sup>g</sup> Department of Biomedicine, Aarhus University, Wilhelm Meyers Allé 4, DK-8000 Aarhus C,  
Denmark

<sup>h</sup> Gravitational Biology and Translational Regenerative Medicine, Faculty of Medicine and  
Mechanical Engineering, Otto-von-Guericke-University Magdeburg, D-39120 Magdeburg,  
Germany

# both contributed equally to this work

**Supplementary Information Table 1 and Figure 1**

**Supplemental Table 1: Flight data of TEXUS-53**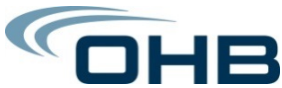**QUICKLOOK****TEXUS – 53**

|                |                    |      |
|----------------|--------------------|------|
| Launching date | <b>January, 23</b> | 2016 |
| Launching time | <b>09:30:00</b>    | LT   |
| $\mu$ -g Time  | <b>367</b>         | Sec  |
| Payload weight | <b>400.1</b>       | Kg   |
| Payload length | <b>5215</b>        | Mm   |

**Motor First stage**

|                          |            |     |
|--------------------------|------------|-----|
| Peak thrust acceleration | 8.3g @ 2.2 | Sec |
| Mean thrust acceleration | 5.2        | G   |
| Burnout                  | 11.9       | Sec |
| Motor Separation         | 12.9       | Sec |

**Motor Second stage**

|                                                   |              |       |
|---------------------------------------------------|--------------|-------|
| Ignition                                          | 15.0         | Sec   |
| Peak thrust acceleration                          | 12.1g @ 34.9 | Sec   |
| Mean thrust acceleration                          | 6.6          | G     |
| Burnout 0%                                        | 43.4         | Sec   |
| Spin at burnout (derived from rate sensor signal) | 2.8          | Hz    |
| YoYo despin                                       | 56.0         | Sec   |
| Roll rate after YoYo despin                       | -18.7 @ 57.6 | °/sec |
| Motor separation                                  | 59.0         | Sec   |

**RCS Acquisition & Control**

|                                     |                  |     |
|-------------------------------------|------------------|-----|
| RCS enable                          | 59.0             | Sec |
| Acquisition phase                   | 59.0 – 66.0      | Sec |
| Manoeuvres at high thrust:          |                  | Sec |
| Manoeuvres at low thrust:           | +Y 399.6 – 403.8 | Sec |
| RCS low thrust enable               | 60.9             | Sec |
| Lateral Destabilization and Spin-up | 458.3            | Sec |
| Achieved spin rate                  | 151°/sec @ 476.3 | Sec |

**Zero-g phase**

|                          |      |     |
|--------------------------|------|-----|
| $\mu$ -g achieved signal | 66.0 | Sec |
|--------------------------|------|-----|

|                                                  |       |     |
|--------------------------------------------------|-------|-----|
| Start of zero-g ( $< 1 * 10^{exp-4}$ at sensors) | 73.0  | Sec |
| Time of apogee (derived from GPS data)           | 257.8 | Sec |
| Apogee (derived from GPS data)                   | 252.6 | Km  |
| End of zero-g ( $> 1 * 10^{exp-4}$ at sensors)   | 440.0 | Sec |

### Reentry & Recovery

|                                                  |                   |     |
|--------------------------------------------------|-------------------|-----|
| Tip ejection                                     | 55.3              | Sec |
| Reentry decelerations X= -15.4g Y= +9.7g Z=-0.2g | 480.7/479.7/482.0 | Sec |
| Maximum residual reentry deceleration            | 15.7g @ 481.0     | Sec |
| Heat shield release                              | 4.3g @ 583.9      | Sec |
| Pilot parachute de-reefed                        | 3.8g @ 593.5      | Sec |
| Main parachute release                           | 608.5             | Sec |
| Main parachute de-reefed                         | 2.1g @ 620.1      | Sec |
| Sink rate                                        | 7.8               | m/s |

### Housekeeping

|                                         |                 |     |
|-----------------------------------------|-----------------|-----|
| Maximal skin temperature descent (POS4) | 123.5°C @ 493.4 | Sec |
|-----------------------------------------|-----------------|-----|

### General

|                                                           |                                        |             |
|-----------------------------------------------------------|----------------------------------------|-------------|
| Loss of TM-Data & GPS last message at                     | 877.0                                  | Sec         |
| Loss of GPS (4 samples) 0.0 – 3.0                         |                                        | Sec         |
| Last coordinates derived from onboard GPS via TM          | 68°30.1385'                            | N           |
|                                                           | 21°02.6830'                            | E           |
| Landing coordinates from onboard recorder                 | 68°30.1589'                            | N           |
|                                                           | 21°02.6645'                            | E           |
| Slant Range Distance (Azimuth = 357.9°)                   | 67.9                                   | Km          |
| Landing Altitude                                          | 640                                    | M           |
| Impact decelerations (max.) X= -0.2g / Y= -0.3g / Z= 8.5g | 887.6/887.9/887.6                      | Sec         |
| Payload recovery time                                     | 5:30                                   | H           |
| Weather conditions                                        | Fog in lower altitude, above clear sky | -23.5<br>°C |
| Air pressure (Launcher)                                   | 975                                    | Mbar        |
| Number of count-downs                                     | 1                                      |             |

### **Supplementary Information**

**Supplemental Figure 1: Illustration of the different acceleration stimulations during launch and microgravity phase.** In the hyper-g phase after lift-off the acceleration forces act perpendicularly towards the cells. When entering the microgravity phase the in-flight centrifuge turns on. Due to the special arrangement of the experimental units (brown boxes) on the pivotal platform, the cells are stimulated with 1g parallel to the cell growth surface. The figure was drawn from scratch by MK.

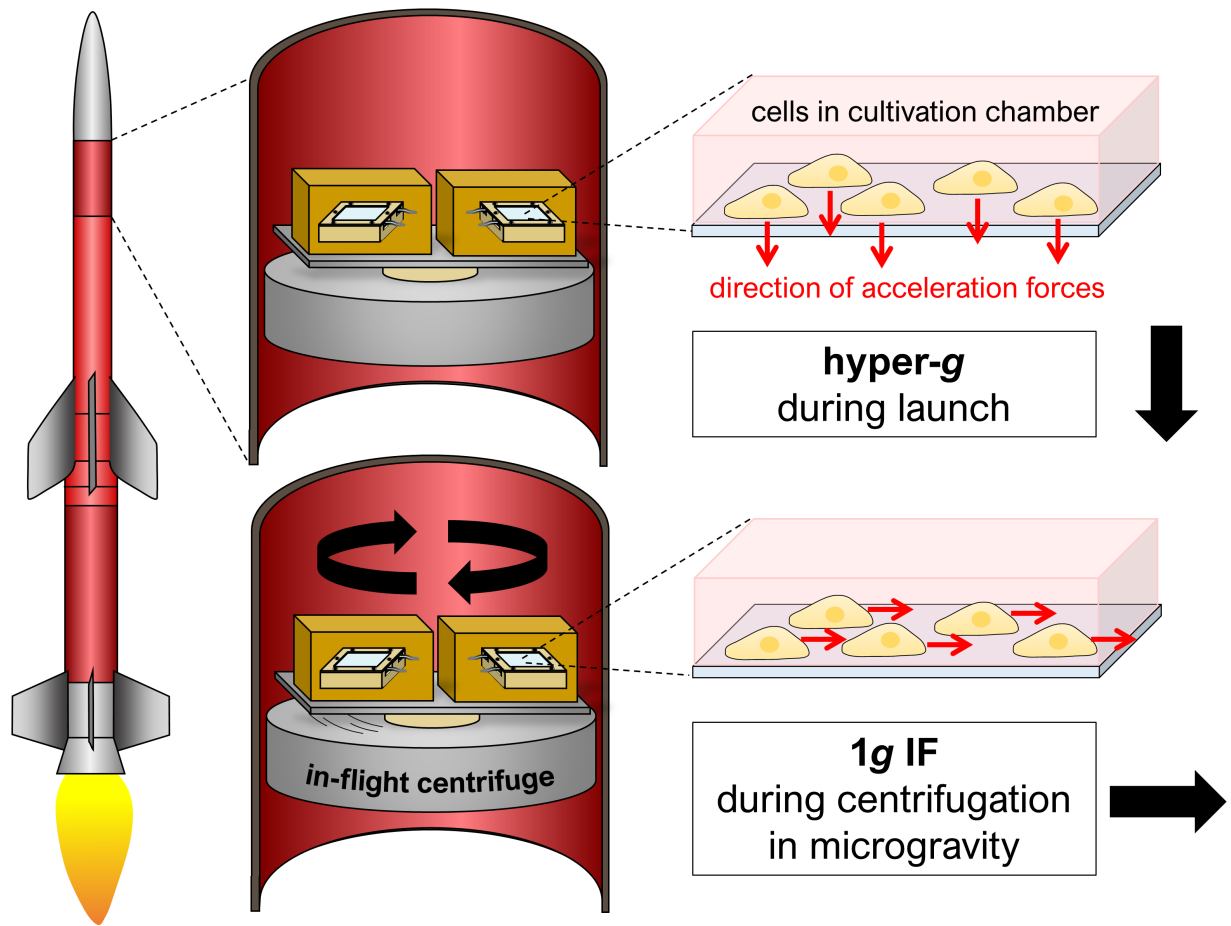

Supplement: MOESM1 [file 41598_2018_28695_MOESM1_ESM.pdf]
